# Supplementary material for: Optical and electronic properties of mixed halide (X = I, Cl, Br) methylammonium lead perovskite solar cells
Source: Royal Society of Chemistry journal article supplement (doi:10.1039/c6tc04830g), 2017-01-01
Supplement: c6tc04830g1.pdf [file c6tc04830g1.pdf]

## Optical and electronic properties of mixed halide (X = I, Cl, Br) methylammonium lead perovskite solar cells.

Sekai Tombe<sup>a,b</sup>, Getachew Adam<sup>b</sup>, Herwig Heilbrunner<sup>b</sup>, Dogukan Hazar Apaydin<sup>b</sup>, Christoph Ulbricht<sup>b</sup>, Niyazi Serdar Sariciftci<sup>b</sup>, Christopher J. Arendse<sup>c</sup>, Emmanuel Iwuoha<sup>a</sup> and Markus C. Scharber<sup>b,\*</sup>

<sup>a</sup>SensorLab, Department of Chemistry, University of the Western Cape, Robert Sobukwe Road, Bellville, Cape Town 7535, South Africa

<sup>b</sup>Linz Institute for Organic Solar Cells (LIOS), Institute of Physical Chemistry, Johannes Kepler University Linz, Altenbergerstrasse 69, 4040 Linz, Austria

<sup>c</sup>Department of Physics, University of the Western Cape, Private Bag X17, Bellville, 7535, South Africa

\*Corresponding author - Markus\_Clark.Scharber@jku.at

## SUPPORTING INFORMATION

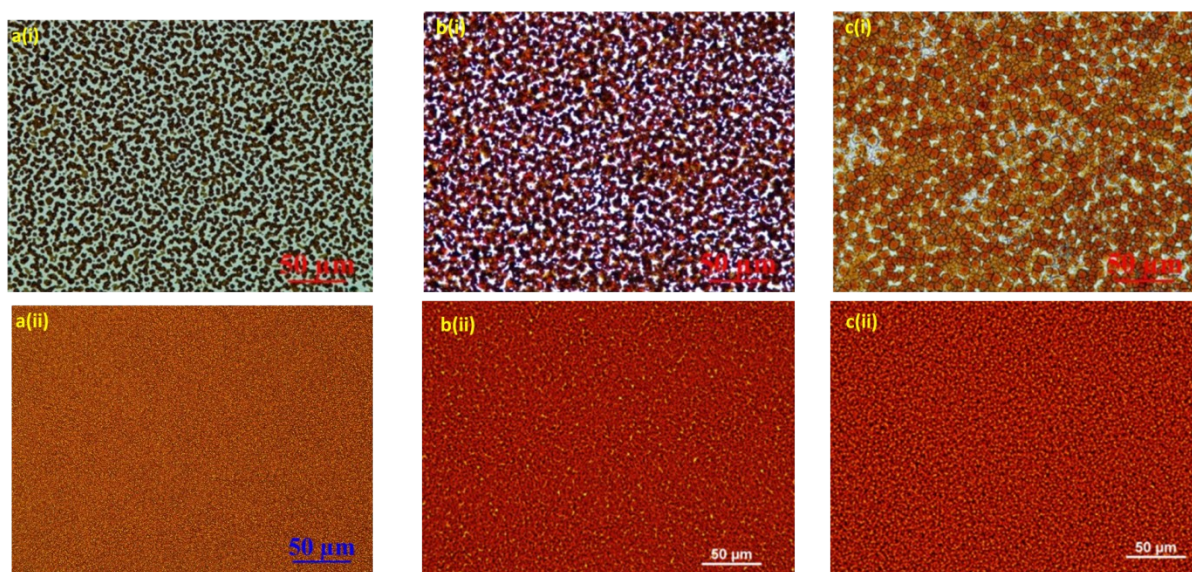

**Figure S1:** Diascopic illumination optical microscopy images on (i) Glass/ITO and on (ii) Glass/ITO/ PEDOT.PSS of (a) MAPbI<sub>3</sub>, (b) MAPbI<sub>3-x</sub>Cl<sub>x</sub> and (c) MAPbI<sub>3-x</sub>Br<sub>x</sub>.

a)

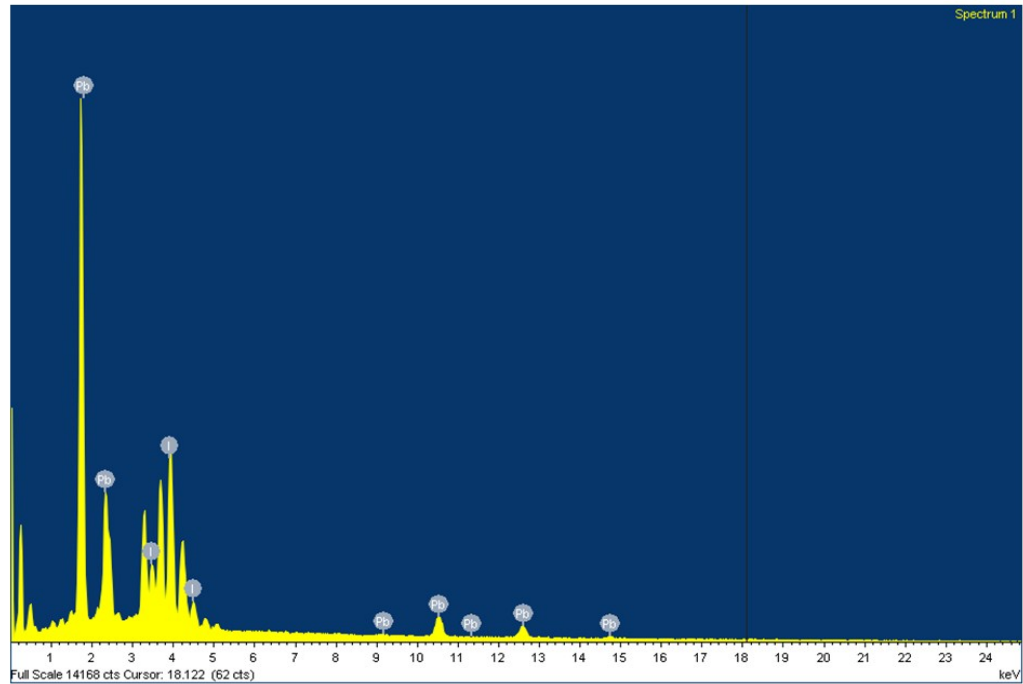

b)

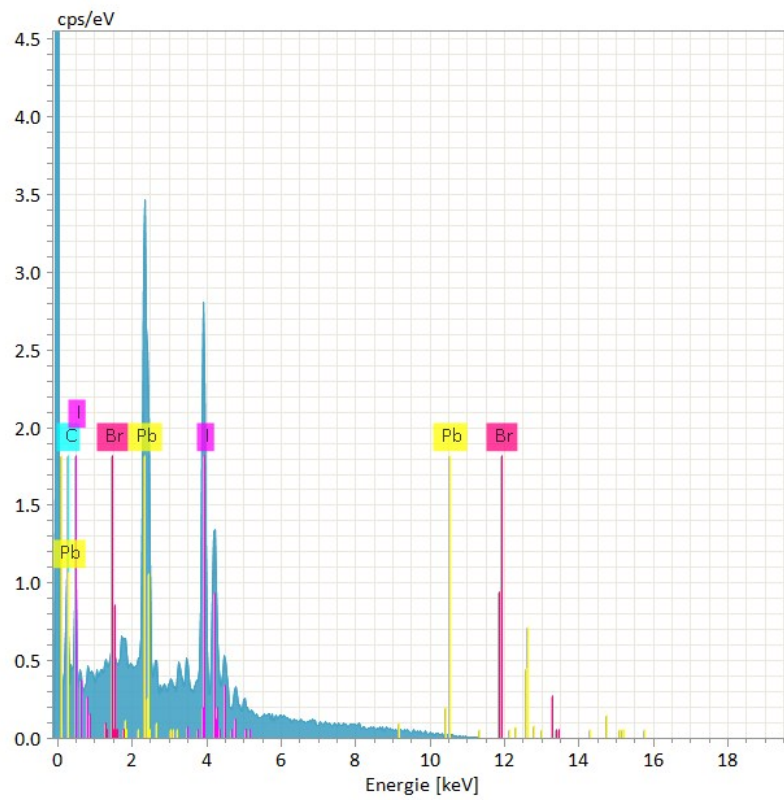

**Figure S2:** a) EDX spectra of thin film of perovskite ( $\text{MAPbI}_{3-x}\text{Cl}_x$ ) on a glass substrate coated with high conductivity PEDOT:PSS (PH1000) containing 5% v/v (DMSO). b) EDX

data of a thin film of  $\text{CH}_3\text{NH}_3\text{PbI}_{3-x}\text{Br}_x$  on a glass substrate coated with ITO/PEDOT: PSS (Clevos PH).

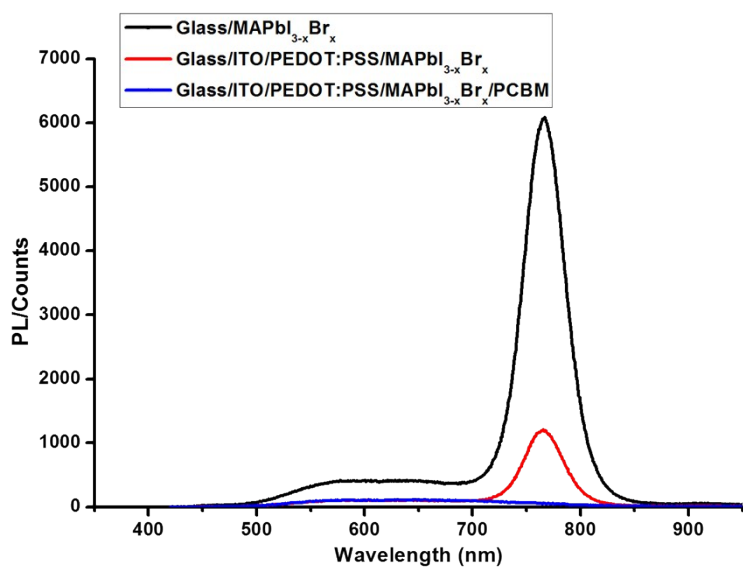

**Figure S3:** Photoluminescence quenching in perovskite samples.

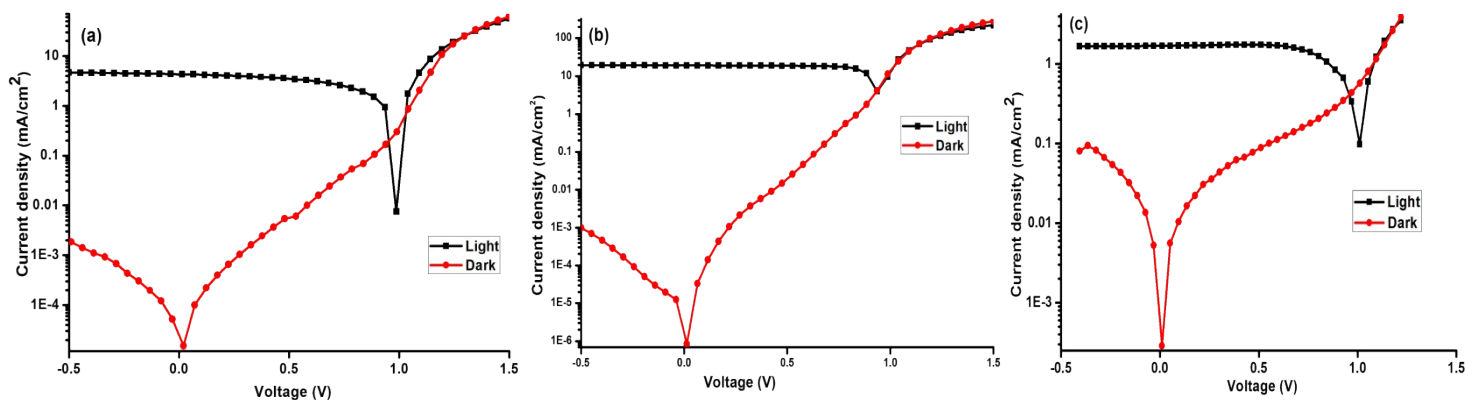

**Figure S4:** Semi-logarithmic current-voltage characteristics (a)  $\text{MAPbI}_3$ , (b)  $\text{MAPbI}_{3-x}\text{Cl}_x$  and (c)  $\text{MAPbI}_{3-x}\text{Br}_x$

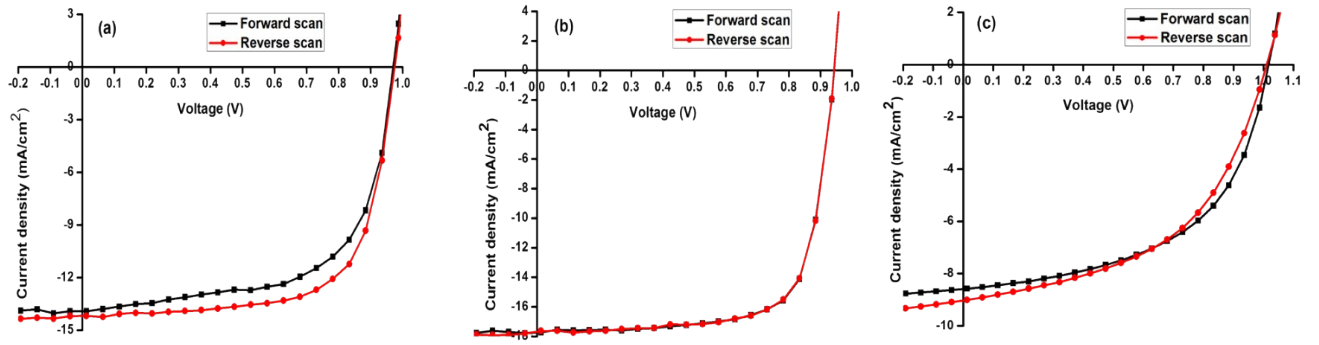

**Figure S5:** Current-voltage curve of the perovskite solar cell, forward and reverse scan 20 mV/s showing minimum hysteric behaviour.

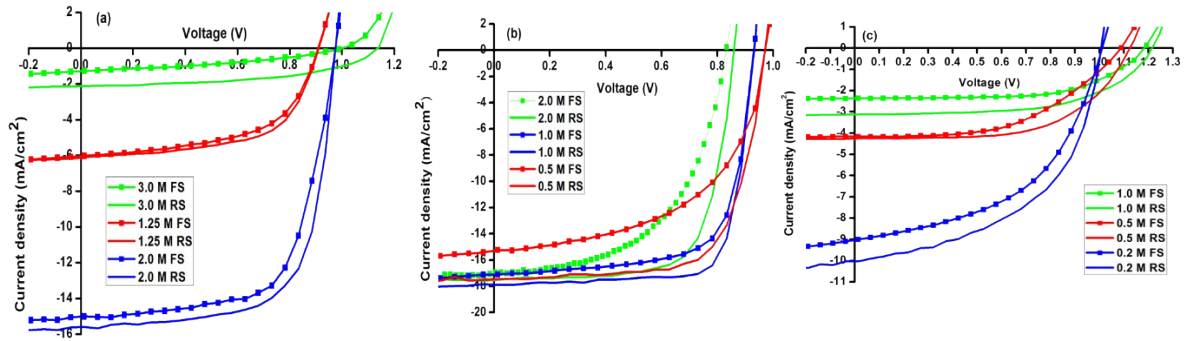

**Figure S6:** Concentration-dependent forward and reverse J-V scans of ITO/PEDOT:PSS/MAPbX<sub>3</sub>/PCBM/Al solar cells (a) PbMAI<sub>3</sub>, (b) PbMAI<sub>3-x</sub>Cl<sub>x</sub> and (c) PbMAI<sub>3-x</sub>Br<sub>x</sub>

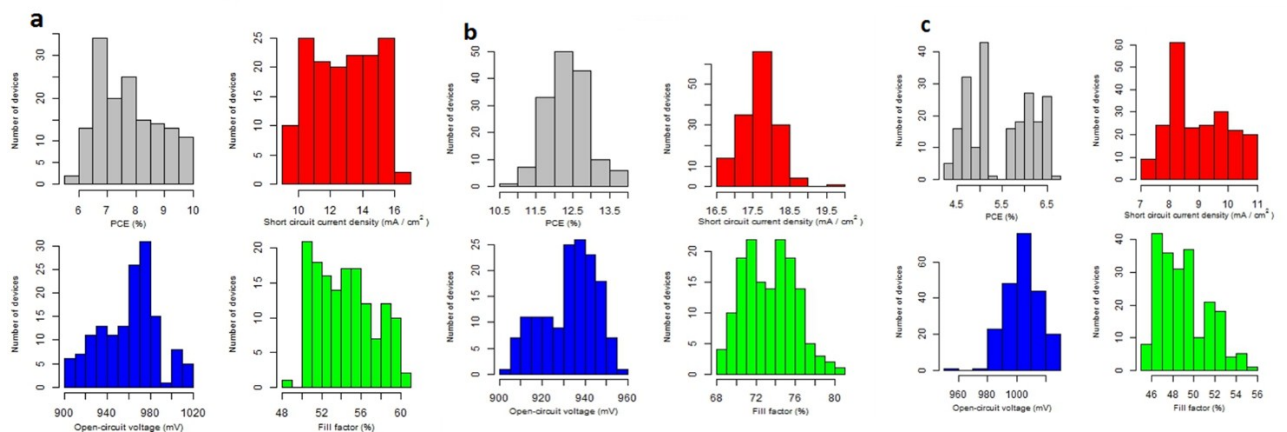

**Figure S7:** Histograms of device parameters ( $V_{oc}$ ,  $J_{sc}$ , FF and PCE) for 100 separate (a) PbMAI<sub>3</sub>, (b) PbMAI<sub>3-x</sub>Cl<sub>x</sub> and (c) PbMAI<sub>3-x</sub>Br<sub>x</sub> devices.

**Table S1:** Photovoltaic device parameters ( $V_{oc}$ ,  $J_{sc}$ , FF and PCE) for  $\text{PbMAI}_3$ ,  $\text{PbMAI}_{3-x}\text{Cl}_x$  and  $\text{PbMAI}_{3-x}\text{Br}_x$  devices.

| <b>Perovskite</b>               | <b><math>V_{oc}</math> (mV)</b> | <b><math>J_{sc}</math> (mA/cm<sup>2</sup>)</b> | <b>FF</b>  | <b>PCE (%)</b> |
|---------------------------------|---------------------------------|------------------------------------------------|------------|----------------|
| $\text{PbMAI}_3$                | 961 ± 26                        | 12.8 ± 2.0                                     | 54.4 ± 2.9 | 7.7 ± 1.1      |
| $\text{PbMAI}_{3-x}\text{Cl}_x$ | 933 ± 13                        | 17.6 ± 0.5                                     | 73.4 ± 2.6 | 12.3 ± 0.6     |
| $\text{PbMAI}_{3-x}\text{Br}_x$ | 1005 ± 12                       | 9.0 ± 1.0                                      | 49.0 ± 2.3 | 5.5 ± 0.7      |
